# Supplementary material for: Hierarchical flower-like MoS2/reduced graphene oxide nanohybrids supported on nickel foam as a high-performance electrode material for supercapacitor applications
Source: Royal Society of Chemistry journal article supplement (doi:10.1039/d2ta08416c), 2023-01-01
Supplement: d2ta08416c1.pdf [file d2ta08416c1.pdf]

## Supplementary Material

### **Hierarchical flower-like MoS<sub>2</sub>/reduced graphene oxide nano hybrids supported on nickel foam as high-performance electrode material for supercapacitor applications**

*Silki Sardana<sup>1</sup>, Sajjan Dahiya<sup>1</sup>, Rajesh Punia<sup>1</sup>, A.S. Maan<sup>1</sup>, Kuldeep Singh<sup>2</sup> and Anil Ohlan<sup>1</sup>*

<sup>1</sup>Department of Physics, Maharshi Dayanand University, Rohtak-124001, India

<sup>2</sup>CSIR-Central Electrochemical Research Institute (CECRI) Chennai Unit, CSIR Madras Complex, Taramani, Chennai- 600113, India

#### **1. General Characterizations**

Powder X-ray diffraction (XRD) spectra has been recorded on Rigaku Miniflex 600 X-Ray Diffractometer at room temperature with Cu K<sub>α</sub> radiation ( $\lambda = 1.540598 \text{ \AA}$ ) in scattering range ( $2\theta$ ) from 5° to 70° at the scan rate of 1°/min. Raman spectroscopy measurement has been performed on Laser Raman Microscope with model LabRAM HR Evolution. High-Resolution Transmission Electron Microscope (HRTEM) measurements have been performed on Talos F200S (FEI Netherland) at point resolution 0.25 nm and line resolution 0.14 nm. Field Emission Scanning Electron Microscope (FESEM) images were collected on model JEOL JSM-7610FPlus. The investigation of N<sub>2</sub> adsorption/desorption isotherms have been conducted using a Quantachrome Autosorb Analyzer at 77 K. The specific surface area, pore volume, and pore size distribution of samples have been evaluated using Brunauer-Emmett-Teller (BET), t-plot and Barret-Joyner-Halenda (BJH) protocols, respectively. XPS has been collected on X-ray photoelectron spectrometer module ESCALAB 250 XI, Thermo scientific.

#### **2. Electrochemical characterizations**

The electrochemical testing was carried out using an electrochemical workstation (VMP-300, Biologic France) at an ambient temperature with 1 M Na<sub>2</sub>SO<sub>4</sub> solution using cyclic

---

<sup>1</sup> Corresponding Author Email: [anilohlan@gmail.com](mailto:anilohlan@gmail.com); [anilohlan.physics@mdurohtak.ac.in](mailto:anilohlan.physics@mdurohtak.ac.in)

voltammetry (CV), galvanostatic charge/discharge (GCD) and electrochemical impedance spectroscopy (EIS) techniques. CV measurements have been recorded in voltage window -0.6 to 0.6 V within scan rate (0.2 to 5 mV/s). GCD analysis has been accomplished at different current densities (30 to 150 mA/g) within a voltage window of -0.6 to 0.6 V. EIS studies have been conducted at 10 mV sinusoidal signal within frequency range (10 mHz to 100 kHz). The cycle stability was tested by repeating 10000 cycles at a fixed current density of 660 mA/g.

### 3. Additional morphological studies

Fig. S1 shows low-magnification FESEM pictures of Ni foam and Ni foam coated MG nano hybrids. Fig. S1 (a) clearly displays porous morphology of Ni foam with average pore diameter of about 200  $\mu\text{m}$ . It can be seen from Fig. S1 (b-d) that MG nano hybrids have been successfully coated onto and within the pores of Ni foam, which facilitates fast electron transmission.

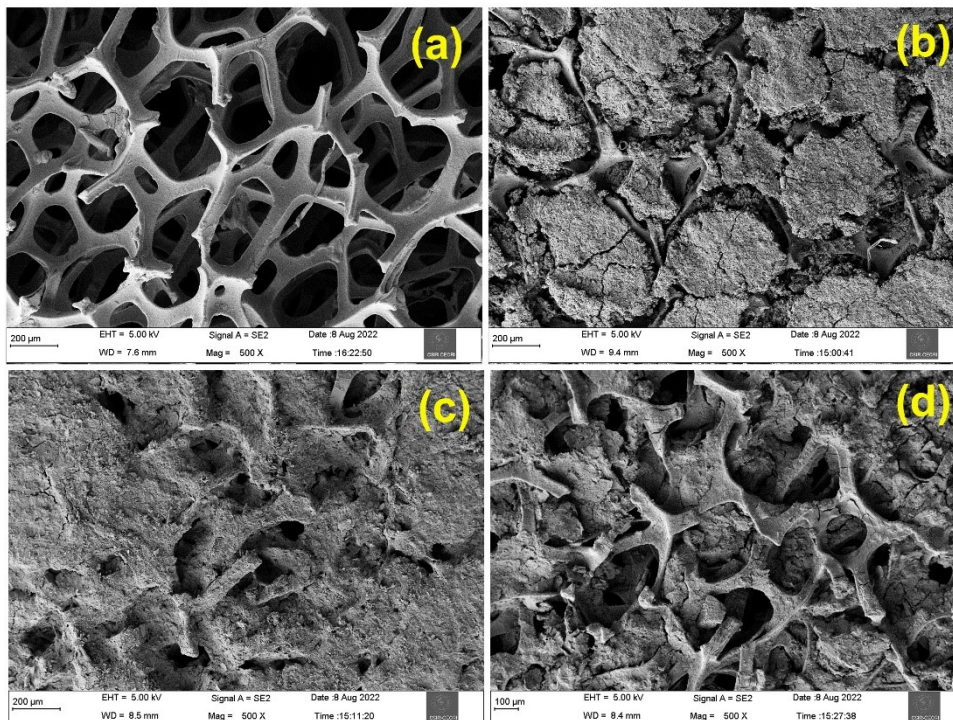

**Fig. S1** FESEM images of (a) pure Ni foam, Ni foam coated (b) MG-0.5, (c) MG-1 and (d) MG-2 nano hybrid at lower magnification.

**Table S1** Fitted parameters obtained after simulating EIS data

| Sample | Model   | $R_s$<br>( $\Omega$ ) | $Q_2$<br>( $F.s^{(a-1)}$ ) | $n_2$  | $R_{ct}$<br>( $\Omega$ ) | $Q_3$<br>( $F.s^{(a-1)}$ ) | $n_3$  | $R_d$<br>( $\Omega$ ) |
|--------|---------|-----------------------|----------------------------|--------|--------------------------|----------------------------|--------|-----------------------|
| MG-2   | Model 1 | 2.741                 | 0.04578                    | 0.3139 | 1.466                    | 1.411                      | 0.9797 | -                     |
| MG-1   | Model 1 | 2.592                 | 0.05007                    | 0.3285 | 5.875                    | 0.3287                     | 0.86   | -                     |
| MG-0.5 | Model 1 | 4.832                 | 0.01754                    | 0.338  | 3.59                     | 0.6298                     | 0.8862 | -                     |
| MS     | Model 2 | 2.73                  | 1.586e-3                   | 0.4812 | 5.565                    | 0.731                      | 0.998  | 66                    |

**Table S2** Comparison of previously reported MoS<sub>2</sub> based supercapacitors and the findings of current work.

| Electrode material                | Electrolyte                                                    | Specific capacitance                                 | Specific Energy<br>(Wh/kg) | Specific Power<br>(W/kg) | Cycle stability                           | Ref.           |
|-----------------------------------|----------------------------------------------------------------|------------------------------------------------------|----------------------------|--------------------------|-------------------------------------------|----------------|
| MoS <sub>2</sub> /CC              | 1 M Na <sub>2</sub> SO <sub>4</sub>                            | 2236.6 mF/cm <sup>2</sup><br>@ 10 mA/cm <sup>2</sup> | -                          | -                        | 86.1 % after<br>2000 cycles               | 1              |
| MoS <sub>2</sub><br>nanostructure | 1 M Na <sub>2</sub> SO <sub>4</sub>                            | 92.85 F/g @<br>0.5 mA/cm <sup>2</sup>                | 7.25                       | 186.5                    | 93.8 % after<br>1000 cycles               | 2              |
| MoS <sub>2</sub> nanosheet        | 1 M Na <sub>2</sub> SO <sub>4</sub>                            | 129.2 F/g @ 1<br>A/g                                 | -                          | -                        | 85.1 % after<br>500 cycles                | 3              |
| MoS <sub>2</sub> @3DG             | 1 M LiPF <sub>6</sub> in<br>EC/DMC/EM<br>C with 10 wt<br>% FEC | 688 mAh/g @<br>8 A/g                                 | 156                        | 197                      | 997 mAh/g<br>after 700<br>cycles at 2 A/g | 4              |
| 1T-MoS <sub>2</sub> @rGO-<br>H    | DES                                                            | 169.6 F/g @<br>1A/g                                  | 31.2                       | 1164                     | 91 % after<br>20000 cycles                | 5              |
| MoS <sub>2</sub> -rGO/GCE         | 1 M Na <sub>2</sub> SO <sub>4</sub>                            | 387.6 F/g @<br>1.2 A/g                               | -                          | -                        | No loss upto<br>1000 cycles               | 6              |
| 2H/1 T-<br>MoS <sub>2</sub> @rGO  | 6 M KOH                                                        | 275 F/g @<br>1 A/g                                   | 55                         | 3000                     | 97 % after<br>5000 cycles                 | 7              |
| 3D<br>MoS <sub>2</sub> /C@RGO     | 1 M Na <sub>2</sub> SO <sub>4</sub>                            | 340.0 F/g @ 1<br>A/g                                 | -                          | -                        | 90 % after<br>1000 cycles                 | 8              |
| MoS <sub>2</sub> /rGO             | 1 M KCl                                                        | 850 F/g<br>@1A/g                                     | -                          | --                       | 95.3 % after<br>10000 cycles              | 9              |
| MG-2                              | 1 M Na <sub>2</sub> SO <sub>4</sub>                            | 2049.90 F/g                                          | 192.43                     | 337.36                   | 100 % after                               | <b>Present</b> |

## References

- 1 C. Zhou, J. Wang, X. Yan, X. Yuan, D. Wang, Y. Zhu and X. Cheng, *Ceram. Int.*, 2019, **45**, 21534–21543.
- 2 K. Krishnamoorthy, G. K. Veerasubramani, S. Radhakrishnan and S. J. Kim, *Mater. Res. Bull.*, 2014, **50**, 499–502.
- 3 K.-J. Huang, J.-Z. Zhang, G.-W. Shi and Y.-M. Liu, *Electrochim. Acta*, 2014, **132**, 397–403.
- 4 F. Zhang, Y. Tang, H. Liu, H. Ji, C. Jiang, J. Zhang, X. Zhang and C.-S. Lee, *ACS Appl. Mater. Interfaces*, 2016, **8**, 4691–4699.
- 5 C.-W. Lien, B. Vedhanarayanan, J.-H. Chen, J.-Y. Lin, H.-H. Tsai, L.-D. Shao and T.-W. Lin, *Chem. Eng. J.*, 2021, **405**, 126706.
- 6 M. Saraf, K. Natarajan and S. M. Mobin, *ACS Appl. Mater. Interfaces*, 2018, **10**, 16588–16595.
- 7 D. Vikraman, I. Rabani, S. Hussain, K. Sundaram, S. Ramesh, H. Kim, Y. Seo, J. Jung and H. Kim, *Int. J. Energy Res.*, 2021, **45**, 9193–9209.
- 8 Q. Liu, A. Gao, Y. Huang, F. Yi, S. Zhao, H. Chen, R. Zeng, Z. Sun, D. Shu and X. Song, *J. Alloys Compd.*, 2019, **777**, 1176–1183.
- 9 M. M. Baig, E. Pervaiz, M. Yang and I. H. Gul, *Front. Mater.*, 2020, **7**, 323.
